# Supplementary material
Source: publisher figshare collection journal article supplement (https://gsapubs.figshare.com/ndownloader/files/30991660)
Supplement: Supplementary file 1 [file 30991660]

## Sheet: Лист1
T0C	t (min)	40Ar(STP)	40Ar/39Ar	±1σ	38Ar/39Ar	±1σ	37Ar/39Ar	±1σ	36Ar/39Ar	±1σ	Ca/K	∑39Ar	Age (Ma)	±1σ
												(%)	±1σ
Sample 118-6 biotite, weight 32,16 mg, J = 0.005061 ± 0.000067*; integrated age = 252.5 ± 3.4 Ma; plateau age (725-1130ºС) = 251.6 ± 3.8 Ma
500	10	6.1*e-9	56.757	1.178	0.0161	0.0174	0.08	1.48	0.0888	0.0087	0.298	0.8	259	20.7		TabS2
650	10	75.1*e-9	34.944	0.076	0.0142	0.0019	0.02	0.1	0.0131	0.0004	0.084	16.4	263.6	3.4		Kurapov, M., Ershova, V., Khudoley, A., Luchitskaya, M., Stockli, D., Makariev, A.,
725	10	133.5*e-9	31.056	0.025	0.0168	0.0009	0.04	0.08	0.006	0.0011	0.129	47.7	249.2	4		Makarieva, E., and Vishnevskaya, I., 2021, Latest Permian–Triassic Magmatism of the
775	10	33.9*e-9	35.646	0.056	0.0214	0.0027	0.09	0.21	0.0253	0.0046	0.308	54.6	240.3	11.4		Taimyr Peninsula: New evidence for a connection to the Siberian Traps large igneous
850	10	46.5*e-9	33.353	0.05	0.0187	0.0024	0.16	0.02	0.0131	0.001	0.559	64.8	250.9	3.9		province: Geosphere, v. 17, https://doi.org/10.1130/GES02421.1.
925	10	21.8*e-9	32.908	0.092	0.0124	0.003	0	0.19	0.0074	0.002	0.005	69.6	260.8	5.7
1025	10	47.5*e-9	31.597	0.05	0.0185	0.0019	0.11	0.17	0.0085	0.0016	0.409	80.5	247.8	4.9
1130	10	81.4*e-9	30.44	0.031	0.0154	0.0007	0.04	0.06	0.0019	0.0009	0.155	100	254.1	3.8
Sample 118-11 biotite, weight 32,09 mg, J = J = 0.005033 ± 0.000066*; integrated age = 234.5 ± 6.0 Ma; plateau age (750-1130ºС) = 236.3 ± 4.9 Ma
500	10	3.9*e-9	39.972	1.198	0.0391	0.0331	2.44	1.36	0.1342	0.0302	8.779	1	2.9	80.2
650	10	38.5*e-9	33.675	0.338	0.0311	0.0113	0.49	0.02	0.0245	0.01	1.767	13.1	225.3	24
750	10	87.9*e-9	30.146	0.052	0.0219	0.0016	0.32	0.07	0.0083	0.0017	1.137	44	235.5	5
850	10	61.5*e-9	29.555	0.093	0.026	0.0042	0.13	0.1	0.0044	0.0032	0.473	66	240	8
950	10	32.2*e-9	31.68	0.383	0.0179	0.0055	0.21	0.43	0.0077	0.0121	0.755	76.8	249.1	28.5
1050	10	32.8*e-9	32.03	0.065	0.0288	0.005	0.05	0.18	0.0149	0.002	0.178	87.6	234.9	5.6
1130	10	37.3*e-9	31.935	0.243	0.0339	0.0086	0.47	0.2	0.0139	0.0076	1.693	100	236.4	18.2
Sample 111-1 biotite, weight 62,54 mg, J = 0.004725 ± 0.000058*; integrated age = 231.8 ± 2.8 Ma; plateau age (650-1130ºС) = 234.9 ± 2.8 Ma
500	10	25.2*e-9	93.005	0.679	0.07305	0.01034	2.76	1.64	0.272	0.007	9.93	1.2	104.7	15.9
600	10	55.8*e-9	63.698	0.224	0.0441	0.00285	2.25	1.13	0.1209	0.0046	8.09	5	223.9	10.4
700	10	133.9*e-9	37.888	0.025	0.02245	0.0003	0.23	0.24	0.0318	0.0007	0.82	20.3	227.9	3.1
800	10	121.6*e-9	34.217	0.022	0.01695	0.00038	0.25	0.21	0.0153	0.0003	0.9	35.8	236.9	2.8
900	10	153.4*e-9	32.198	0.036	0.01881	0.00063	0.41	0.13	0.01	0.0009	1.46	56.5	233.5	3.4
1000	10	180.5*e-9	32.268	0.026	0.01738	0.00024	0.11	0.05	0.0112	0.0005	0.39	80.8	231.4	2.9
1130	10	165.1*e-9	37.423	0.038	0.02101	0.00072	0.04	0.24	0.0254	0.0011	0.13	100	238.6	3.6
Sample 108-1a amphibole, weight 94,64 mg, J = 0.003647 ± 0.000035*; integrated age =234.9 ± 10.1 Ma; plateau age (800-1130ºС) = 226.3 ± 5.6 Ma
500	10	5.2*e-9	997.37	625.99	1.4051	0.9991	4.95	61.88	3.298	2.163	17.83	0.3	144	1126.7
650	10	7.4*e-9	171.98	9.72	0.0064	0.0318	2.17	8.21	0.181	0.057	7.8	2.8	648.5	82.4
800	10	12.6*e-9	68.15	1.8	0.0037	0.0149	0.15	1.31	0.113	0.027	0.52	13.3	215.8	45.8
900	10	16.4*e-9	53.65	0.95	0.0207	0.0119	0.87	1.39	0.064	0.018	3.13	30.7	214.6	30.9
1000	10	11.9*e-9	58.44	1.34	0.023	0.0138	0.33	1.09	0.074	0.023	1.19	42.3	226.6	39.7
1130	10	45.7*e-9	45.25	0.14	0.0166	0.0029	3.45	0.3	0.029	0.003	12.41	100	226.9	5.8
* J – neutron flux parameter
